# Supplementary material for: Sociodemographic Trends in Planetary Health Diets among Nutrition Students in Türkiye: Bridging Classroom to Kitchen
Source: MDPI journal article supplement (doi:10.3390/nu16091277), 2024-04-25
Supplement: s1 [file s1]

**Table S1.** MANOVA test results including Healthy Eating Index-2020 and Planetary Health Diet Index total scores differences according to the sociodemographic variables interactions

| <b>Variables</b>                                     | <b>Pillai's Trace</b> | <b>F</b> | <b>df</b> | <b>Error df</b> | <b>p</b> | <b><math>\eta^2</math></b> |
|------------------------------------------------------|-----------------------|----------|-----------|-----------------|----------|----------------------------|
| Age groups * Regions                                 | 0.067                 | 1.417    | 24        | 988             | 0.088    | 0.033                      |
| Age groups * Residence area                          | 0.012                 | 0.748    | 8         | 988             | 0.649    | 0.006                      |
| Age groups * Income level                            | 0.015                 | 0.918    | 8         | 988             | 0.500    | 0.007                      |
| Regions * Residence area                             | 0.031                 | 0.649    | 24        | 988             | 0.901    | 0.016                      |
| Regions * Income level                               | 0.066                 | 1.413    | 24        | 988             | 0.090    | 0.033                      |
| Residence area * Income level                        | 0.018                 | 1.100    | 8         | 988             | 0.360    | 0.009                      |
| Age groups * Regions * Residence area                | 0.037                 | 1.177    | 16        | 988             | 0.280    | 0.019                      |
| Age groups * Regions * Income level                  | 0.027                 | 1.357    | 10        | 988             | 0.196    | 0.014                      |
| Age groups * Residence area * Income level           | 0.016                 | 0.998    | 8         | 988             | 0.436    | 0.008                      |
| Regions * Residence area * Income level              | 0.076                 | 1.223    | 32        | 988             | 0.185    | 0.038                      |
| Age groups * Regions * Residence area * Income level | 0.010                 | 0.827    | 6         | 988             | 0.549    | 0.005                      |

**Table S2.** MANOVA test results including Healthy Eating Index-2020 and Planetary Health Diet Index total scores differences according to the sociodemographic variables

| Scores differences according to the sociodemographic variables |    |       |       |        |                                   | 95% Confidence Interval |        |
|----------------------------------------------------------------|----|-------|-------|--------|-----------------------------------|-------------------------|--------|
| Dependent Variables                                            | df | F     | η2    | p      | Independent Variables             | Lower                   | Upper  |
|                                                                |    |       |       |        |                                   | Bound                   | Bound  |
| Age Groups                                                     |    |       |       |        |                                   |                         |        |
| Planetary Health Diet Index                                    | 2  | 0.684 | 0.003 | <0.001 | <20 years <sup>a</sup>            | 51.106                  | 59.005 |
|                                                                |    |       |       |        | 20-25 years <sup>b</sup>          | 50.751                  | 56.529 |
|                                                                |    |       |       |        | >25 years <sup>a,b</sup>          | 48.003                  | 59.202 |
| Healthy Eating Index-2020                                      | 2  | 0.402 | 0.002 | 0.002  | <20 years <sup>a</sup>            | 46.942                  | 52.895 |
|                                                                |    |       |       |        | 20-25 years <sup>b</sup>          | 47.320                  | 51.674 |
|                                                                |    |       |       |        | >25 years <sup>a,b</sup>          | 45.874                  | 54.314 |
| Regions                                                        |    |       |       |        |                                   |                         |        |
| Planetary Health Diet Index                                    | 6  | 1.265 | 0.015 | 0.038  | Marmara <sup>a</sup>              | 48.672                  | 57.012 |
|                                                                |    |       |       |        | Aegean <sup>a</sup>               | 53.099                  | 66.549 |
|                                                                |    |       |       |        | Mediterranean <sup>a</sup>        | 50.798                  | 61.886 |
|                                                                |    |       |       |        | Black Sea <sup>a</sup>            | 52.202                  | 65.242 |
|                                                                |    |       |       |        | Central Anatolia <sup>b</sup>     | 44.768                  | 53.199 |
|                                                                |    |       |       |        | Eastern Anatolia <sup>a,b</sup>   | 44.059                  | 59.367 |
|                                                                |    |       |       |        | Southeast Anatolia <sup>a,b</sup> | 45.511                  | 59.730 |
| Healthy Eating Index-2020                                      | 6  | 1.048 | 0.013 | 0.007  | Marmara <sup>a</sup>              | 44.917                  | 51.201 |
|                                                                |    |       |       |        | Aegean <sup>a,b</sup>             | 47.210                  | 57.345 |
|                                                                |    |       |       |        | Mediterranean <sup>a,b</sup>      | 46.265                  | 54.621 |
|                                                                |    |       |       |        | Black Sea <sup>a,b</sup>          | 43.181                  | 53.008 |
|                                                                |    |       |       |        | Central Anatolia <sup>b</sup>     | 44.314                  | 50.668 |
|                                                                |    |       |       |        | Eastern Anatolia <sup>a,b</sup>   | 43.598                  | 55.135 |
|                                                                |    |       |       |        | Southeast Anatolia <sup>a,b</sup> | 49.199                  | 59.914 |
| Residence Area                                                 |    |       |       |        |                                   |                         |        |
| Planetary Health Diet Index                                    | 2  | 0.696 | 0.003 | <0.001 | Metropolis <sup>a</sup>           | 47.811                  | 55.824 |
|                                                                |    |       |       |        | Urban <sup>b</sup>                | 50.402                  | 58.325 |
|                                                                |    |       |       |        | Rural <sup>a</sup>                | 52.137                  | 58.959 |
| Healthy Eating Index-2020                                      | 2  | 1.076 | 0.004 | <0.001 | Metropolis <sup>a</sup>           | 47.269                  | 53.308 |
|                                                                |    |       |       |        | Urban <sup>b</sup>                | 44.601                  | 50.572 |
|                                                                |    |       |       |        | Rural <sup>a</sup>                | 48.528                  | 53.669 |
| Income Level                                                   |    |       |       |        |                                   |                         |        |
| Planetary Health Diet Index                                    | 2  | 1.701 | 0.007 | 0.006  | Low <sup>a</sup>                  | 52.721                  | 61.594 |
|                                                                |    |       |       |        | Adequate <sup>b</sup>             | 49.480                  | 55.431 |
|                                                                |    |       |       |        | High <sup>a</sup>                 | 49.066                  | 57.389 |
| Healthy Eating Index-2020                                      | 2  | 0.724 | 0.003 | 0.035  | Low <sup>a</sup>                  | 47.242                  | 53.929 |
|                                                                |    |       |       |        | Adequate <sup>b</sup>             | 47.498                  | 51.982 |
|                                                                |    |       |       |        | High <sup>a,b</sup>               | 45.810                  | 52.083 |

<sup>a, b</sup>represent the statistically significant differences among the column groups at  $p < 0.05$ .
